# Supplementary material for: Correlating phosphoproteomic signaling with castration resistant prostate cancer survival through regression analysis
Source: Royal Society of Chemistry journal article supplement (doi:10.1039/c3mb70403c), 2013-12-10
Supplement: c3mb70403c.pdf [file c3mb70403c.pdf]

**Supplemental Figure 1.** Standard curves generated when performing 384 well phospho-ELISA assays for phosphorylation sites (Table 1) on each of the listed proteins.

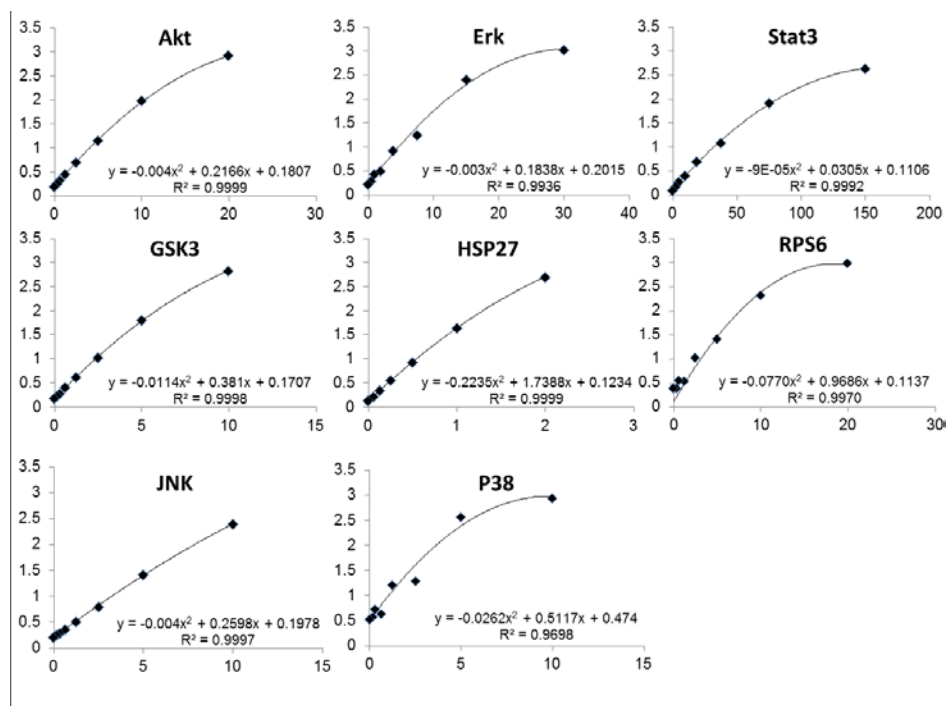

**Supplemental Table 1.** Listings of the rows and columns for the heatmap displayed in Figure 1B.
